# Supplementary material for: Designing 3D-nanosubstrates mimicking biological cell growth: pitfalls of using 2D substrates in the evaluation of anticancer efficiency
Source: Royal Society of Chemistry journal article supplement (doi:10.1039/d1nr03816h), 2021-01-01
Supplement: d1nr03816h1.pdf [file d1nr03816h1.pdf]

## Supplementary Information

### Designing 3D-Nanosubstrates Mimic Biological Cell Growth: Pitfalls of Using 2D Substrates in Evaluation of Anticancer Efficiency

Ashwini Patil<sup>1+</sup>, Semonti Nandi<sup>1+</sup>, Narendra Kale<sup>1</sup>, Chandrashekhar Bobade<sup>1</sup>, Shashwat Banerjee<sup>2</sup>, Yuvraj Patil<sup>\*2</sup> and Jayant Khandare<sup>\*3,4</sup>

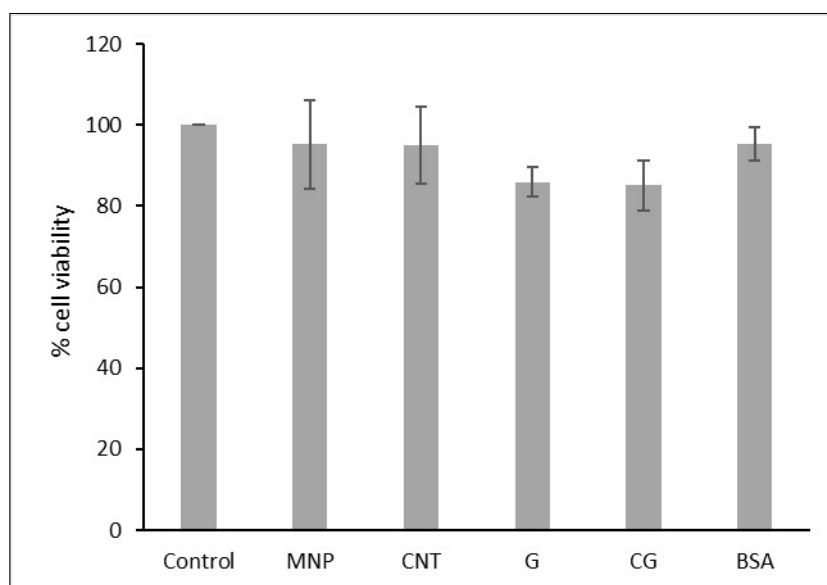

**Fig. S1. Cell viability studies.** HCT 116 cells were incubated on 3D NS substrates- MNP, CNT, G, CG and BSA, and effect of substrate on cell viability was analysed.
